# Supplementary material
Source: Springer Nature journal article supplement (https://www.springermedizin.de/resource/supplementary/13075_2009_2785_MOESM4_ESM.pdf/9692878)

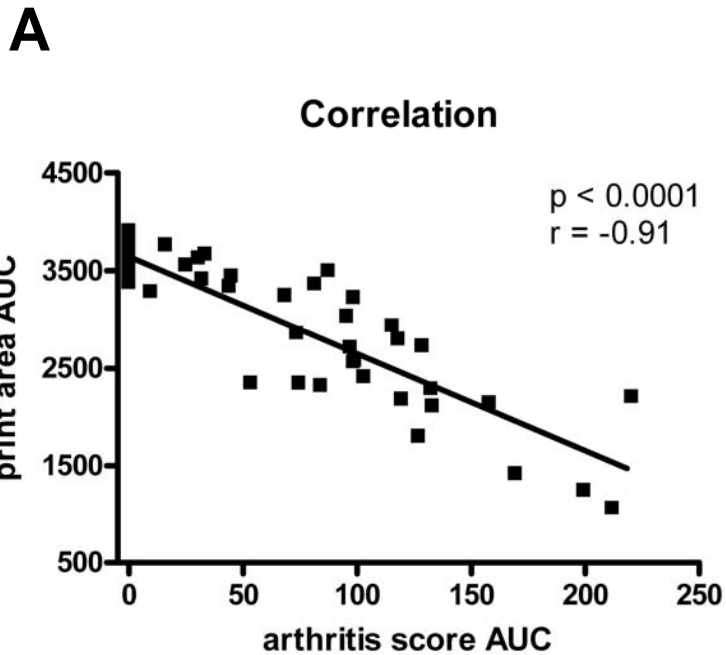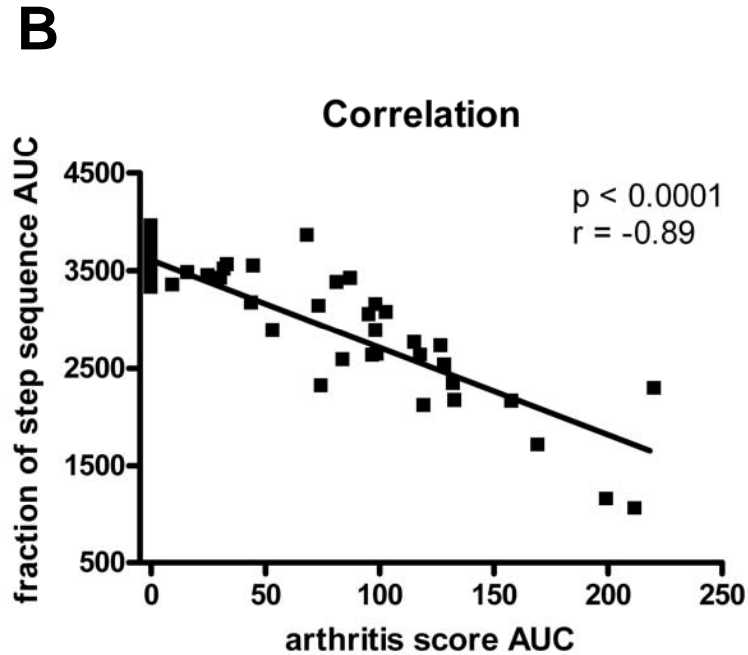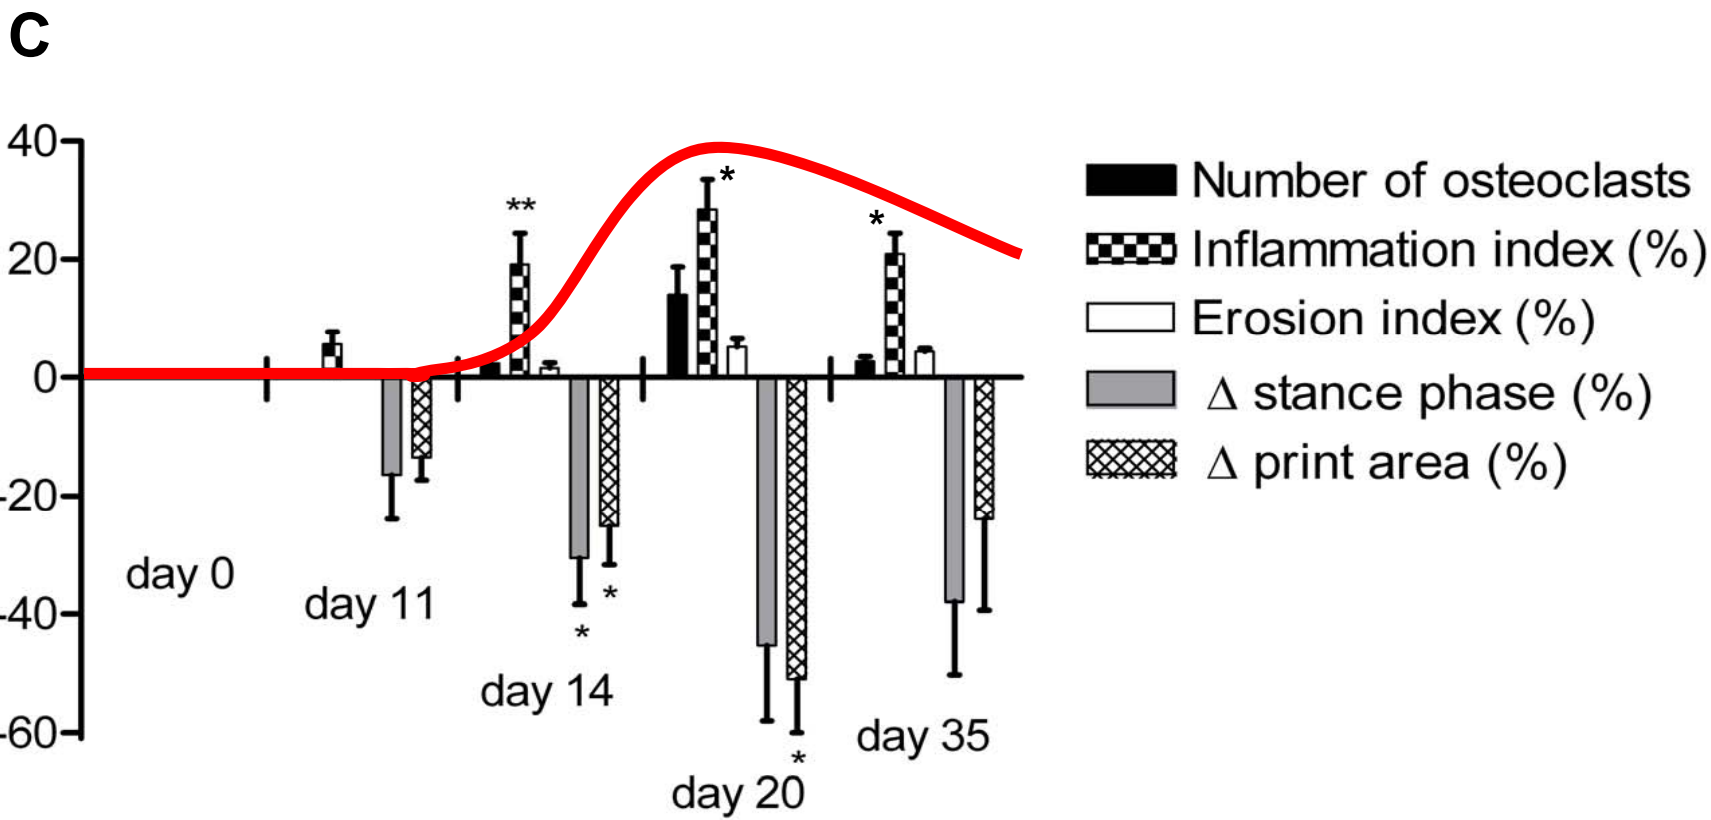

Supplement: MOESM4 [file 9692878]
